# Supplementary material
Source: MDPI journal article supplement (https://www.mdpi.com/1999-4907/7/2/41)
Supplement: s1 [file s1]

**Supplementary Materials: Development of Ash Dieback in South-Eastern Germany and Increasing Occurrence of Secondary Pathogens**

Heike D. Lenz, Bernadett Bartha, Ludwig Straßer and Hannes Lemme


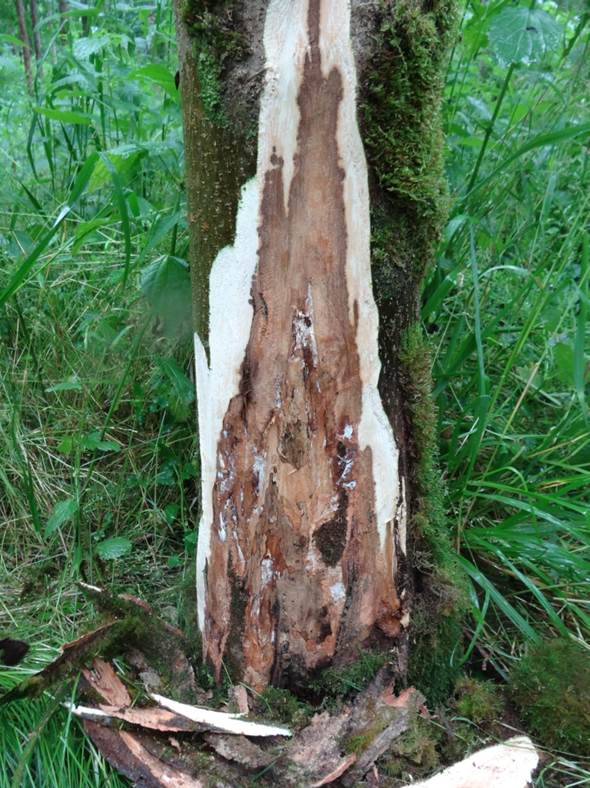


**Figure S1.** *Armillaria* stem discoloration and collar rot with white mycelial fans could be found on most ash trees in the four examined ash stands.


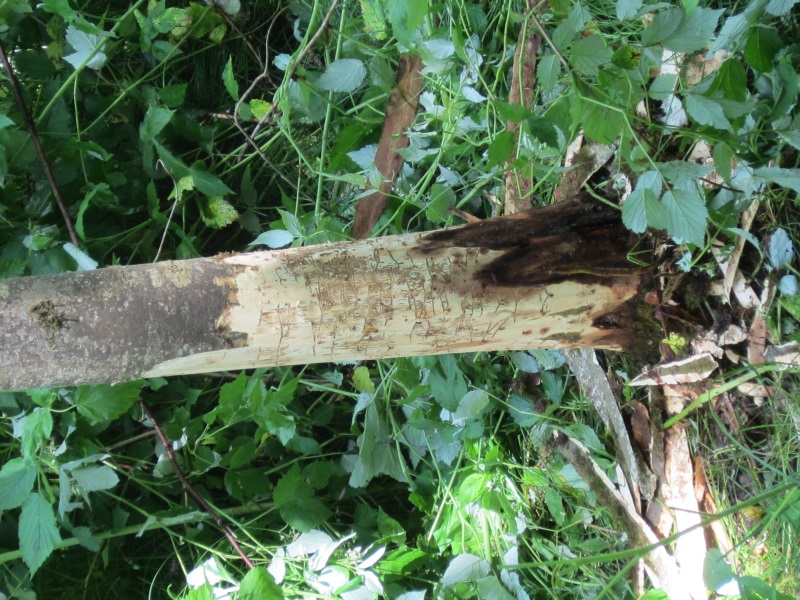


**Figure S2.** Breeding galleries of *Hylesinus fraxini* were only found on dying trees without leaves, but still greenish under the bark. Also collar rots are visible.


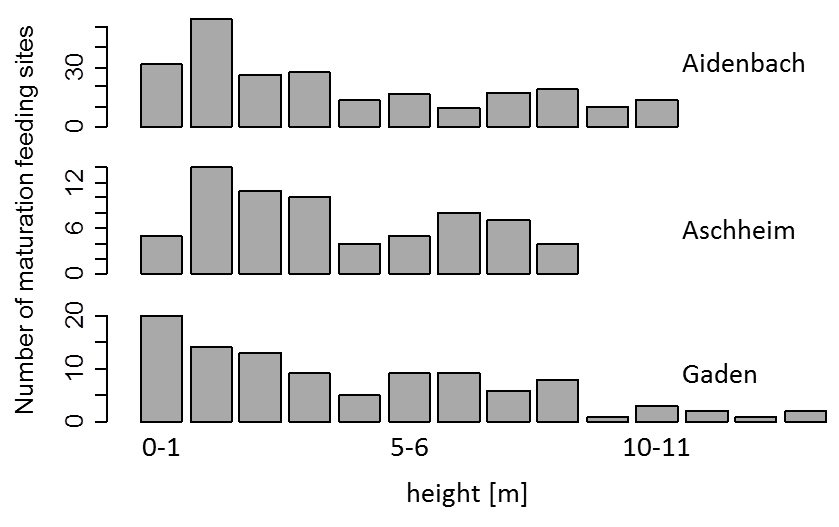


**Figure S3.** The number of sites of maturation feeding in relation to the height was determined in three ash stands for three trees, respectively. One representative for each stand is shown in Aidenbach (a), Aschheim (b) and Gaden (c).

| 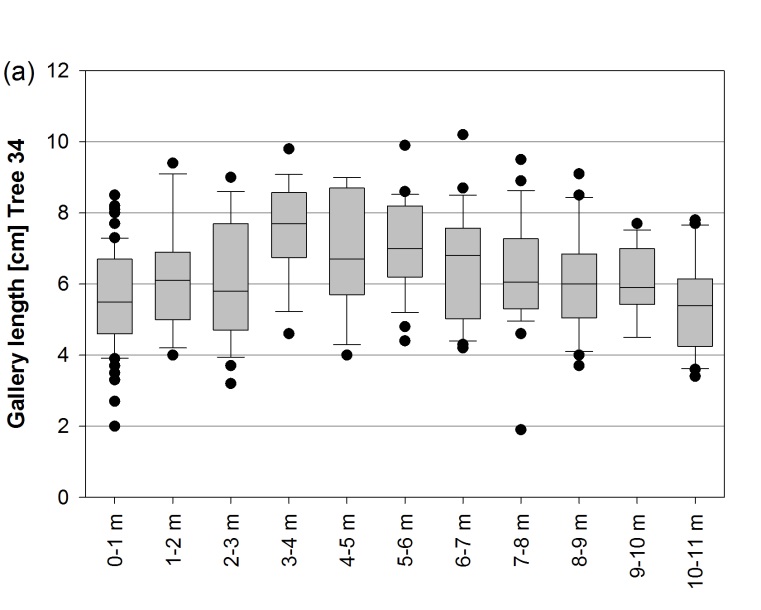 |
| --- |
| 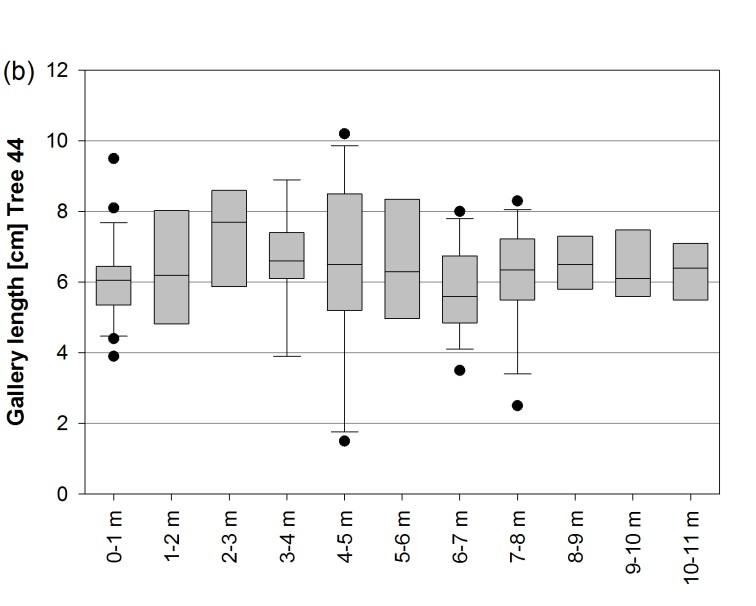 |
| 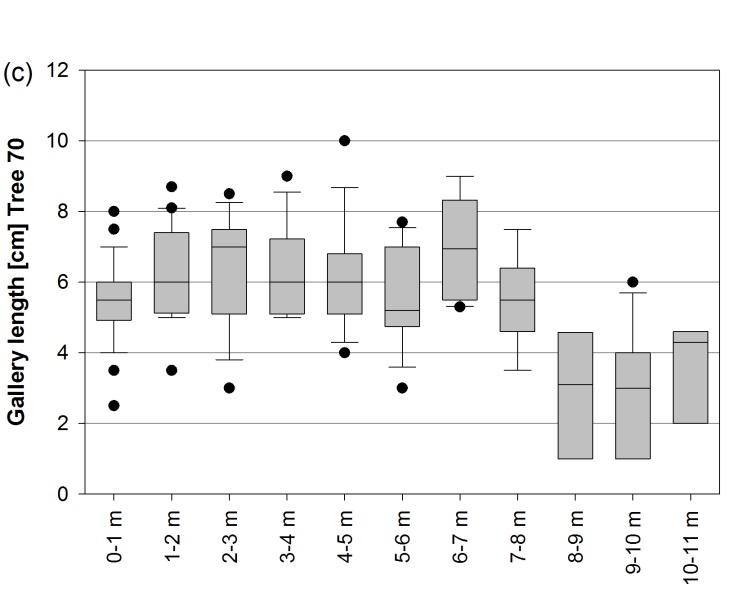 |

**Figure S4.** The medial gallery lengths (cm) of three ash trees belonging to the vitality group 5 (**a**–**c**) at different heights were measured in Gaden in 2013.
